# Supplementary material for: Climate Change Alters The Interaction of Two Invasive Beachgrasses With Implications For Range Shifts And Coastal Dune Functions
Source: Research Square preprint supplement (doi:10.21203/rs.3.rs-529207/v1), 2021-06-14
Supplement: Supplementary file 1 [file 07cfb7b77163c4c7affb8685.docx]

**Supplemental Information**

Reuben G. Biel and Sally D. Hacker. Climate change alters the interaction of two invasive beachgrasses with implications for range shifts and coastal dune functions.

**Table S1.** Monthly mean daily maximum air temperature (°C) at meteorological observation stations along the US Pacific coast, including Westport, WA (NOAA Station WPTW1), Newport, OR (NOAA Station NWPO3), San Francisco, CA (NOAA Station FTPC1), and Santa Monica, CA (NOAA Station ICAC1). Date range: 2010-2016.

| Month | Westport, WA | Newport, OR | San Francisco, CA | Santa Monica, CA |
| --- | --- | --- | --- | --- |
| January | 9.4 | 11.0 | 13.7 | 18.4 |
| February | 10.1 | 10.7 | 14.6 | 17.3 |
| March | 11.2 | 11.0 | 14.9 | 16.8 |
| April | 12.2 | 11.3 | 15.0 | 17.1 |
| May | 13.9 | 12.5 | 14.9 | 17.6 |
| June | 15.6 | 13.6 | 15.5 | 18.3 |
| July | 16.5 | 14.2 | 15.7 | 19.7 |
| August | 17.5 | 14.3 | 16.4 | 20.3 |
| September | 17.8 | 15.6 | 17.8 | 21.3 |
| October | 15.2 | 14.5 | 18.3 | 21.1 |
| November | 11.3 | 12.4 | 16.1 | 20.0 |
| December | 8.5 | 9.8 | 13.6 | 17.6 |

**Table S2.** Monthly mean daily maximum air and soil temperatures (°C) around or within heated or ambient planters at Hatfield Marine Science Center (HMSC), Newport, OR, USA, from May 2014 to August 2015. Air temperature measurements were obtained from the HMSC meteorological tower. Soil temperature measurements were recorded using a HOBO temperature data logger placed 4 cm below the soil surface, near the center of each sand-filled planter. Soil temperature differences were calculated as heated minus ambient. *prior to initiation of heat treatment.

| Year | Month | Air Temperature | Soil Temperature (Ambient) | Soil Temperature (Heated) | Soil Temperature Difference (Heated-Ambient) |
| --- | --- | --- | --- | --- | --- |
|  | May | 18.5 | 24.6 | 25.4 | 0.8* |
|  | June | 18.0 | 23.6 | 24.5 | 0.9* |
|  | July | 19.8 | 27.0 | 29.7 | 2.7 |
| 2014 | August | 19.9 | 26.5 | 29.3 | 2.8 |
|  | September | 21.1 | 23.7 | 25.7 | 2.0 |
|  | October | 18.2 | 18.6 | 21.7 | 3.1 |
|  | November | 19.2 | 12.4 | 14.5 | 2.1 |
|  | December | 12.0 | 11.2 | 13.5 | 2.3 |
|  | January | 14.6 | 12.1 | 14.4 | 2.3 |
|  | February | 15.1 | 14.5 | 16.5 | 2.0 |
|  | March | 15.2 | 15.8 | 18.1 | 2.3 |
|  | April | 14.6 | 16.9 | 19.1 | 2.2 |
| 2015 | May | 15.7 | 20.0 | 22.4 | 2.4 |
|  | June | 17.8 | 23.4 | 26.2 | 2.8 |
|  | July | 21.1 | 27.2 | 30.2 | 3.0 |
|  | August | 20.6 | 24.5 | 26.6 | 2.1 |

**Table S3.** *A-priori* hypothesized Ricker model variations for estimating log response ratios (i.e., log(final/initial)) of tiller density for *Ammophila arenaria* (AMAR) and *A. breviligulata* (AMBR) as a function of conspecific tiller density (NAMAR and NAMBR), heat, and sand burial treatments. The effects of heat and sand burial on tiller density could be unimportant (---), density independent, and/or density dependent.

| NAMAR | NAMBR | Heat | | Sand Burial | |
| --- | --- | --- | --- | --- | --- |
| Density Independent | Density Dependent | Density Independent | Density Dependent |
| --- | --- | --- | --- | --- | --- |
| Yes | --- | --- | --- | --- | --- |
| --- | Yes | --- | --- | --- | --- |
| Yes | Yes | --- | --- | --- | --- |
| Yes | Yes | Yes | --- | --- | --- |
| Yes | Yes | --- | Yes (NAMAR) | --- | --- |
| Yes | Yes | --- | Yes (NAMBR) | --- | --- |
| Yes | Yes | Yes | Yes (NAMAR) | --- | --- |
| Yes | Yes | Yes | Yes (NAMBR) | --- | --- |
| Yes | Yes | Yes | --- | Yes | --- |
| Yes | Yes | --- | Yes (NAMAR) | Yes | --- |
| Yes | Yes | --- | Yes (NAMBR) | Yes | --- |
| Yes | Yes | Yes | Yes (NAMAR) | Yes | --- |
| Yes | Yes | Yes | Yes (NAMBR) | Yes | --- |
| Yes | Yes | --- | --- | Yes | --- |
| Yes | Yes | --- | --- | --- | Yes (NAMAR) |
| Yes | Yes | --- | --- | --- | Yes (NAMBR) |
| Yes | Yes | --- | --- | Yes | Yes (NAMAR) |
| Yes | Yes | --- | --- | Yes | Yes (NAMBR) |
| Yes | Yes | Yes | --- | --- | Yes (NAMAR) |
| Yes | Yes | Yes | --- | --- | Yes (NAMBR) |
| Yes | Yes | Yes | --- | Yes | Yes (NAMAR) |
| Yes | Yes | Yes | --- | Yes | Yes (NAMBR) |

**Table S4.** Substantially supported models (based on AICc model comparison) of log response ratios (i.e., log(final/initial); LRR) for total biomass, aboveground biomass, and belowground biomass for *Ammophila arenaria* (AMAR) and *A. breviligulata* (AMBR) using the predictors conspecific tiller density (NAMAR or NAMBR), heat, and sand burial treatments.

| Response Variables  Species | Fixed Predictors | df | L | AICc | ∆i | Wi |
| --- | --- | --- | --- | --- | --- | --- |
| A. LRR Total Biomass | |  |  |  |  |  |
| AMAR | NAMBR | 5 | -225.3 | 460.9 | 0.0 | 0.348 |
| AMBR | NAMAR + Sand | 6 | -165.9 | 344.3 | 0.0 | 0.214 |
|  | NAMAR + Sand + Heat | 7 | -165.3 | 345.2 | 0.9 | 0.135 |
|  | NAMAR | 5 | -167.4 | 345.2 | 1.0 | 0.133 |
| B. LRR Aboveground Biomass | |  |  |  |  |  |
| AMAR | NAMBR | 5 | -237.0 | 484.4 | 0.0 | 0.230 |
|  | NAMBR + Heat + Sand + Heat:Sand | 8 | -234.2 | 485.2 | 0.9 | 0.149 |
|  | NAMBR + Sand | 6 | -236.5 | 485.5 | 1.1 | 0.130 |
| AMBR | NAMAR + Sand | 6 | -166.8 | 346.1 | 0.0 | 0.263 |
|  | NAMAR + Heat + Sand | 7 | -166.6 | 347.8 | 1.8 | 0.109 |
|  | NAMAR + Sand + NAMAR:Sand | 7 | -166.6 | 347.9 | 1.8 | 0.105 |
| C. LRR Belowground Biomass | |  |  |  |  |  |
| AMAR | NAMBR + Sand + Heat + Sand:Heat | 8 | -223.9 | 464.5 | 0.0 | 0.230 |
|  | NAMBR + Sand + Heat + Sand:Heat + Sand:NAMBR | 9 | -223.2 | 465.3 | 0.8 | 0.153 |
|  | NAMBR + Sand + Heat + Sand:Heat + Heat:NAMBR | 9 | -223.6 | 466.2 | 1.7 | 0.097 |
| AMBR | NAMAR + Heat | 6 | -190.8 | 394.1 | 0.0 | 0.254 |
|  | NAMAR + Heat + Heat:NAMAR | 7 | -190.5 | 395.7 | 1.5 | 0.119 |
|  | NAMAR + Sand + Heat | 7 | -190.6 | 395.8 | 1.7 | 0.111 |

**Table S5.** Restricted maximum likelihood parameter estimates of log response ratios (i.e., log(final/initial); LRR) and their 95% confident intervals (CI), as well as back-transformed percent change, for the best supported model (based on AICc model comparison; Table S4) of total biomass, aboveground biomass, and belowground biomass for *Ammophila arenaria* (AMAR) and *A. breviligulata* (AMBR) as a function of conspecific tiller density (NAMAR or NAMBR), heat, and sand burial treatments.

| Response Variables  Species | Fixed Predictors | LRR Estimates | 95% CI | | Percent Change |
| --- | --- | --- | --- | --- | --- |
| Lower | Upper |
| A. LRR Total Biomass |  |  |  |  |  |
| AMAR | Intercept | 0.420 | 0.249 | 0.589 | 52 |
|  | NAMBR | -0.020 | -0.032 | -0.008 | –2 |
| AMBR | Intercept | 1.392 | 1.143 | 1.617 | 302 |
|  | NAMAR | -0.011 | -0.018 | -0.004 | –1 |
|  | Sand Burial | -0.168 | -0.363 | 0.001 | –15 |
| B. LRR Aboveground Biomass | |  |  |  |  |
| AMAR | Intercept | 0.239 | 0.055 | 0.421 | 27 |
|  | NAMBR | -0.021 | -0.035 | -0.009 | –2 |
| AMBR | Intercept | 1.203 | 0.969 | 1.407 | 233 |
|  | NAMAR | -0.008 | -0.016 | -0.001 | –1 |
|  | Sand Burial | -0.213 | -0.413 | -0.024 | –19 |
| C. LRR Belowground Biomass | |  |  |  |  |
| AMAR | Intercept | 0.702 | 0.428 | 0.954 | 102 |
|  | NAMBR | -0.023 | -0.035 | -0.010 | –2 |
|  | Heat | 0.189 | -0.141 | 0.553 | 21 |
|  | Sand Burial | 0.515 | 0.154 | 0.848 | 67 |
|  | Heat:Sand Burial | -0.606 | -1.081 | -0.087 | –45 |
| AMBR | Intercept | 2.205 | 1.945 | 2.471 | 807 |
|  | NAMAR | -0.018 | -0.026 | -0.010 | –2 |
|  | Heat | -0.444 | -0.811 | -0.070 | –36 |

**Table S6.** Substantially supported Ricker model results (based on AICc model comparison) of log response ratios (i.e., log(final/initial); LRR) of tiller density for *Ammophila arenaria* (AMAR) and *A. breviligulata* (AMBR) using the predictors conspecific tiller density (NAMAR or NAMBR), heat, and sand burial treatments.

| Response Variables | Fixed Predictors | df | L | AICc | ∆i | Wi |
| --- | --- | --- | --- | --- | --- | --- |

| LRR AMAR Tiller Density |  |  |  |  |
| --- | --- | --- | --- | --- |

|  | NAMAR + NAMBR | 6 | -159.3 | 331.1 | 0.0 | 0.206 |
| --- | --- | --- | --- | --- | --- | --- |
| NAMAR + NAMBR + Sand | 7 | -159.1 | 332.9 | 1.7 | 0.086 |
| NAMAR + NAMBR + NAMBR:Sand | 7 | -159.2 | 330.0 | 1.8 | 0.082 |

| LRR AMBR Tiller Density |  |  |  |  |
| --- | --- | --- | --- | --- |

|  | NAMAR + NAMBR + Sand+ NAMBR:Sand | 8 | -225.8 | 468.5 | 0.0 | 0.268 |
| --- | --- | --- | --- | --- | --- | --- |
| NAMAR + NAMBR + Heat + Sand + NAMBR:Sand | 9 | -225.3 | 469.6 | 1.1 | 0.156 |
| NAMAR + NAMBR + Sand | 7 | -227.6 | 469.8 | 1.3 | 0.137 |

**Table S7.** Restricted maximum likelihood parameter estimates of log response ratios (i.e., log(final/initial); LRR) and their 95% confident intervals (CI), as well as back-transformed percent change, for the best supported model (based on AICc model comparison; Table S6) of tiller densities for *Ammophila arenaria* (AMAR) and *A. breviligulata* (AMBR) as a function of conspecific tiller density (NAMAR or NAMBR), heat, and sand burial treatments.

| Response Variables | Fixed Predictors | 95% CI | | | |
| --- | --- | --- | --- | --- | --- |
| LRR Estimates | Lower | Upper | Percent Change |
| LRR AMAR Tiller Density | |  |  |  |  |
|  | Intercept | 0.268 | -0.015 | 0.546 | 31 |
|  | NAMAR | -0.017 | -0.027 | -0.007 | –2 |
|  | NAMBR | -0.012 | -0.021 | -0.003 | –1 |
| LRR AMBR Tiller Density | |  |  |  |  |
|  | Intercept | 1.869 | 1.303 | 2.439 | 548 |
|  | NAMAR | -0.010 | -0.021 | 0.000 | –1 |
|  | NAMBR | -0.065 | -0.093 | -0.037 | –6 |
|  | Sand | -0.919 | -1.535 | -0.324 | –60 |
|  | Sand:NAMBR | 0.015 | 0.007 | 0.027 | 1 |

**Table S8.** Predicted mean intrinsic growth rate (*r*)*,* carrying capacity (*K*), and competition coefficient (*α*)for *Ammophila arenaria* (AMAR; A) and *A. breviligulata* (AMBR; B) under warming (ambient and heated) and sand burial (low and high) treatments.

| Warming Treatment | Sand Burial Treatment | Species | Intrinsic growth rate  (*r*) | Carrying capacity  (*K*) | Competition coefficient (α) |
| --- | --- | --- | --- | --- | --- |
|  | Low | AMAR | 0.27 | 15.9 | αAB = 0.70 |
| Ambient | AMBR | 2.01 | 30.8 | αBA = 0.16 |
| High | AMAR | 0.27 | 15.9 | αAB = 0. 70 |
|  | AMBR | 1.08 | 32.1 | αBA = 0.31 |
| Heated | Low | AMAR | 0.27 | 15.9 | αAB = 0. 70 |
| AMBR | 1.74 | 26.6 | αBA = 0. 16 |
| High | AMAR | 0.27 | 15.9 | αAB = 0. 70 |
|  | AMBR | 0.81 | 24.1 | αBA = 0. 31 |

**Table S9.** Substantially supported models (based on AICc model comparison) for tiller length, leaf width, and total leaf area for *Ammophila arenaria* (AMAR) and *A. breviligulata* (AMBR) using the predictors conspecific tiller density (NAMAR or NAMBR), heat, and sand burial.

| Response Var.  Species | Fixed Predictors | | | df | L | | AICc | | ∆i | Wi | |
| --- | --- | --- | --- | --- | --- | --- | --- | --- | --- | --- | --- |
| Tiller Length | | |  |  | | |  | |  | | |
| AMAR | NAMAR + NAMBR + Heat + NAMBR:Heat | | | 9 | 611.5 | | -1204.8 | | 0.0 | 0.195 | |
|  | NAMAR + NAMBR + Heat | | | 8 | 609.8 | | -1203.4 | | 1.4 | 0.098 | |
|  | NAMAR + NAMBR + Heat + NAMBR:Heat | | | 9 | 610.8 | | -1203.3 | | 1.5 | 0.093 | |
| AMBR | NAMBR + Sand | | | 7 | 613.2 | | -1212.3 | | 0.0 | 0.222 | |
|  | NAMBR + Sand + NAMAR + Sand:NAMAR | | | 9 | 614.6 | | -1211.0 | | 1.3 | 0.116 | |
|  | NAMBR + Sand + NAMBR:Sand | | | 8 | 613.3 | | -1210.5 | | 1.7 | 0.093 | |
| Leaf Width | | |  |  | | |  | |  | | |
| AMAR | Sand + NAMAR + Sand: NAMAR | | | 8 | 288.8 | | -561.5 | | 0.0 | 0.346 | |
|  | Sand | | | 6 | 285.9 | | -559.7 | | 1.8 | 0.139 | |
|  | Heat + Sand + NAMAR + Sand: NAMAR | | | 9 | 288.9 | | -559.5 | | 2.0 | 0.127 | |
| AMBR | NAMBR + Sand + Heat + NAMBR:Heat | | | 9 | 74.1 | | -130.0 | | 0.0 | 0.242 | |
|  | NAMBR + Sand + NAMBR:Sand | | | 8 | 73.1 | | -130.0 | | 0.1 | 0.235 | |
|  | NAMBR + Sand + Heat + NAMBR:Heat + Sand:Heat | | | 10 | 74.2 | | -128.2 | | 1.8 | 0.097 | |
| Leaf Area | | |  |  | | |  | |  | | |
| AMAR | Sand | | | 6 | -413.6 | | 839.2 | | 0.0 | 0.215 | |
|  | Sand + NAMAR + Sand:NAMAR | | | 8 | -411.8 | | 839.7 | | 0.5 | 0.166 | |
|  | Heat + Sand | | | 7 | -413.2 | | 840.6 | | 1.4 | 0.109 | |
| AMBR | NAMBR + Sand + NAMBR:Sand | | | 8 | -646.3 | | 1308.8 | | 0.0 | 0.184 | |
|  | Null model (intercept only) | | | 5 | -649.7 | | 1309.5 | | 0.7 | 0.127 | |
|  | NAMBR + Sand | | | 7 | -647.9 | | 1310.0 | | 1.1 | 0.104 | |

**Table S10.** Restricted maximum likelihood parameter estimates (log) and their 95% confident intervals (CI), as well as back-transformed percent change, for the best supported models (based on AICc model comparison; Table S9) for tiller length (cm), leaf width (mm), and leaf area (cm2) for *Ammophila arenaria* (AMAR) and *A. breviligulata* (AMBR) using the predictors conspecific tiller density (NAMAR or NAMBR), heat, and sand burial treatments.

| Response Variables  Species | Fixed Predictors | Log  Estimates | 95% CI | | Percent Change |
| --- | --- | --- | --- | --- | --- |
| Lower | Upper |
| Tiller Length |  |  |  |  |  |
| AMAR | Intercept | 4.320 | 4.264 | 4.377 | 75.2 |
|  | NAMAR | 0.002 | 0.000 | 0.003 | 0.2 |
|  | NAMBR | 0.002 | 0.000 | 0.004 | 0.2 |
|  | Heat | 0.076 | 0.008 | 0.144 | 8.0 |
|  | NAMBR:Heat | -0.002 | -0.005 | 0.000 | –0.2 |
| AMBR | Intercept | 4.427 | 4.380 | 4.474 | 83.7 |
|  | NAMBR | 0.004 | 0.002 | 0.006 | 0.4 |
|  | Sand | -0.033 | -0.059 | -0.006 | –3.0 |
| Leaf Width |  |  |  |  |  |
| AMAR | Intercept | 1.391 | 1.329 | 1.453 | 4.0 |
|  | Sand | 0.204 | 0.118 | 0.289 | 23.0 |
|  | NAMAR | 0.002 | -0.001 | 0.004 | 0.2 |
|  | Sand: NAMAR | -0.004 | -0.008 | -0.001 | –0.4 |
| AMBR | Intercept | 2.005 | 1.914 | 2.098 | 7.4 |
|  | NAMBR | -0.002 | -0.006 | 0.002 | –0.2 |
|  | Sand | 0.125 | 0.077 | 0.173 | 13.0 |
|  | Heat | -0.134 | -0.258 | -0.010 | –13.0 |
|  | NAMBR:Heat | -0.302 | –0.322 | –0.282 | –26 |
| Leaf Area |  |  |  |  |  |
| AMAR | Intercept | 4.086 | 3.981 | 4.190 | 59.5 |
|  | Sand | 0.131 | 0.036 | 0.225 | 14.0 |
| AMBR | Intercept | 4.891 | 4.615 | 5.169 | 133.1 |
|  | NAMBR | -0.003 | -0.016 | 0.010 | –0.3 |
|  | Sand | -0.156 | -0.476 | 0.162 | –14.0 |
|  | NAMBR:Sand | 0.015 | -0.002 | 0.032 | 2.0 |


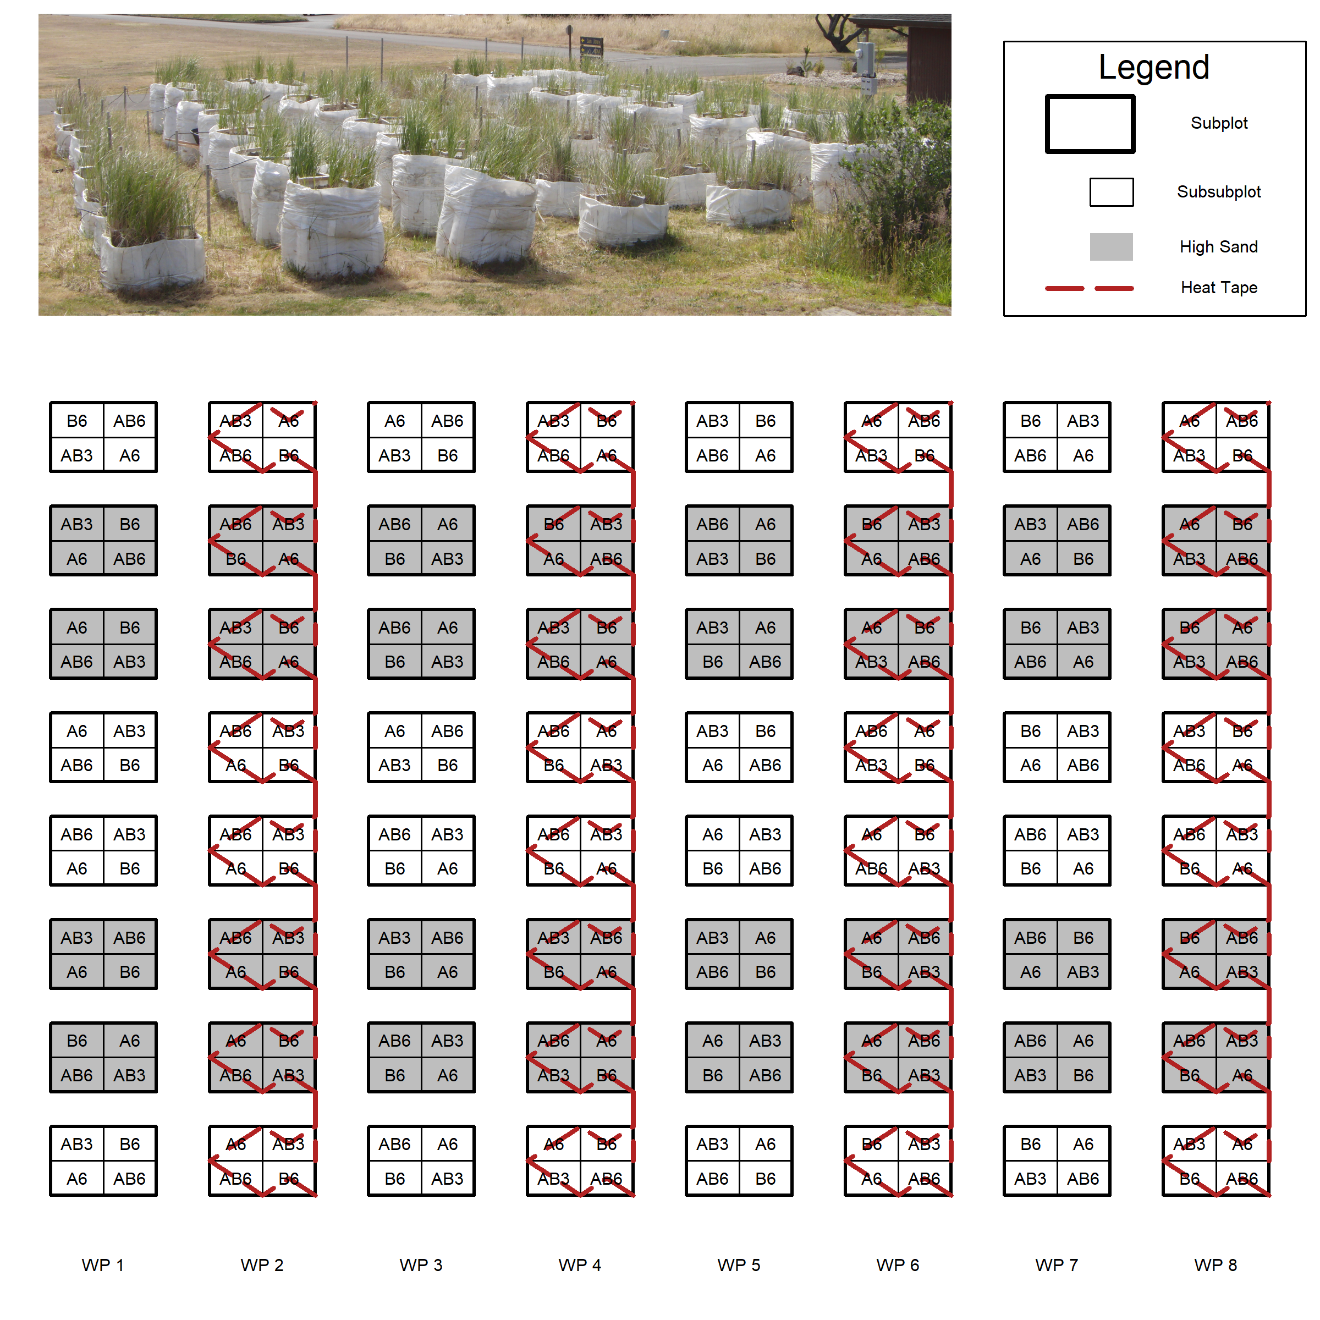


**Figure S1.** Experimental design of beachgrass species interaction experiment at Hatfield Marine Science Center, Newport, OR, USA. Study design consisted of 8 whole plots (WP; columns), 64 subplots (bags), and 256 sub-subplots (quadrants). Heat treatments (heat tape in red) were applied to whole plots, such that all bags within a single whole plot are connected via a single heat tape circuit. Sand additions (grey boxes) were applied to individual bags, and grass species combinations were applied within quadrants. Text inside quadrants indicates initial beachgrass planting combinations: A6 = 6 *Ammophila arenaria* plants; B6 = 6 *A. breviligulata* plants; AB3 = 3 *A. arenaria* and 3 *A. breviligulata* plants; and AB6 indicates 6 *A. arenaria* and 6 *A. breviligulata* plants. Photo by R. Biel.


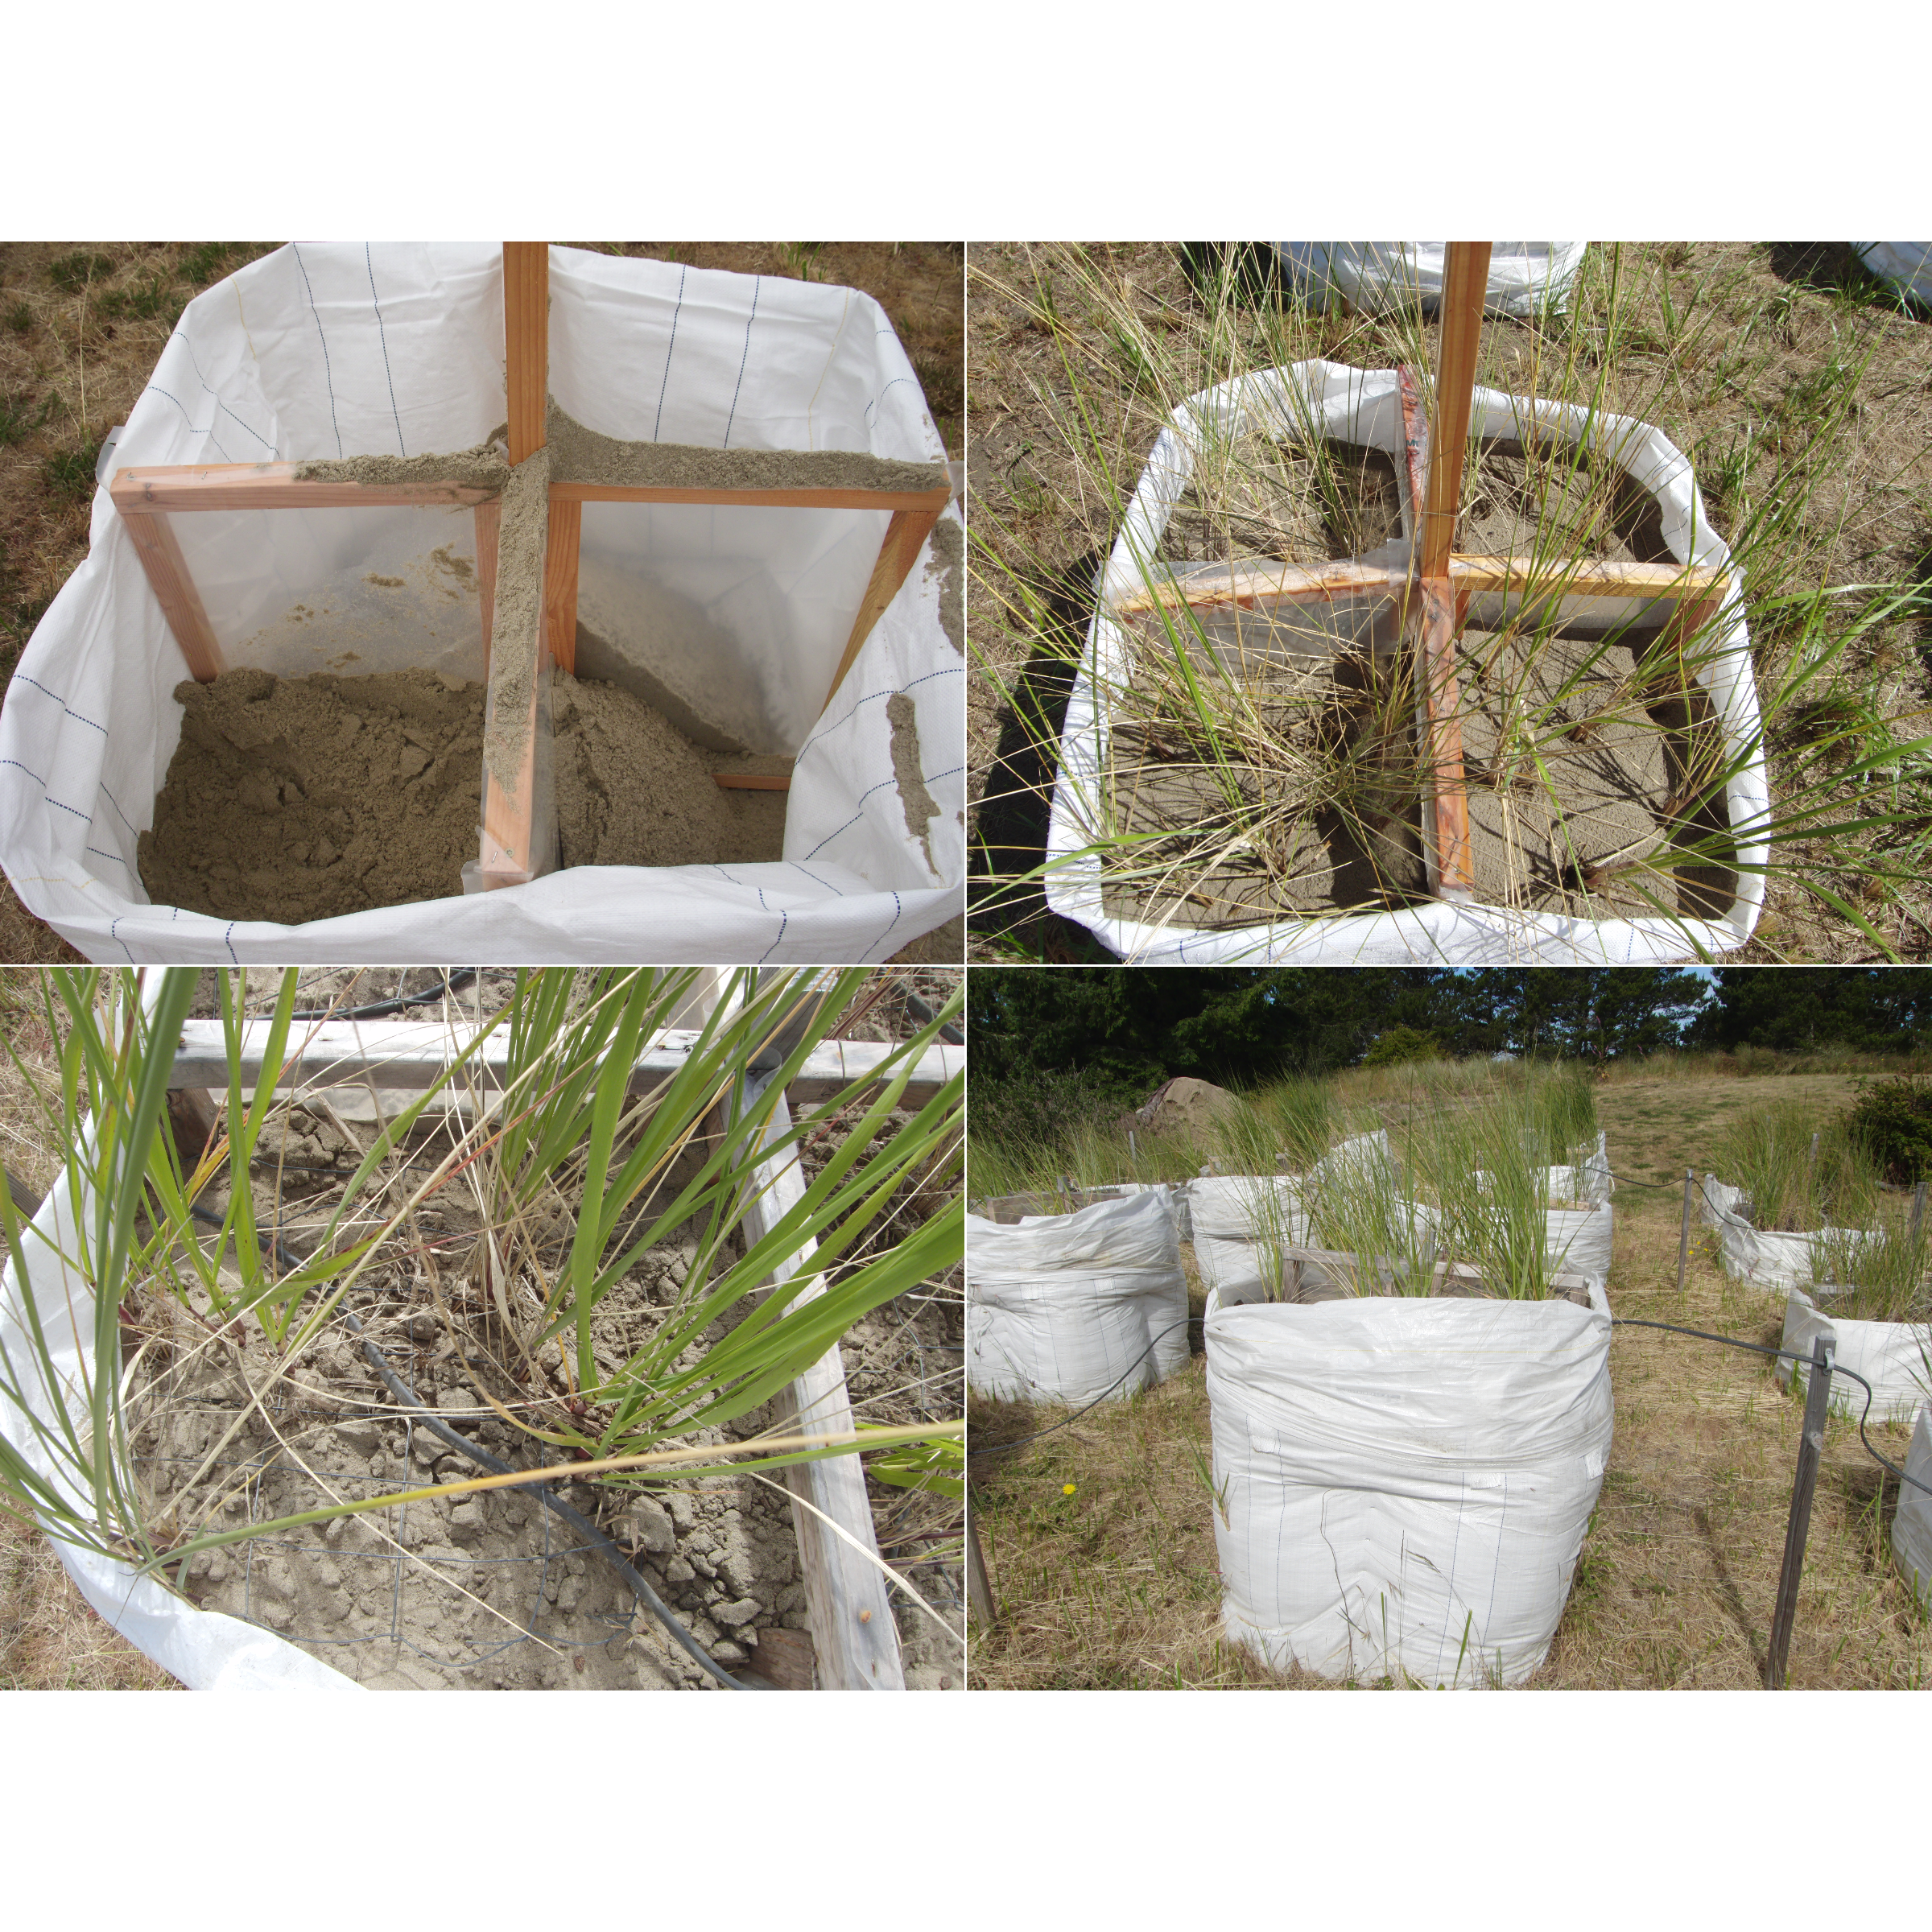


**Figure S2.** Photographs depicting geotextile bag construction and experimental treatments. (Top-left) Geotextile bag subdivided into four quadrants using greenhouse film. (Top-right) Bag receiving high sand burial treatment with different combinations of *Ammophila* *arenaria* and *A. breviligulata* within each quadrant. (Bottom-left) Heat tape woven through wire mesh, just prior to sand addition. Heat tape and wire mesh were buried beneath 4 cm of sand. (Bottom-right) Bags with heat and sand burial treatments. All heat treatments within a single whole plot (column of bags) are connected via a single electrical circuit of heat tape (black wire). Sand burial treatment levels are evident from the differing geotextile bag heights. Photo by R. Biel.


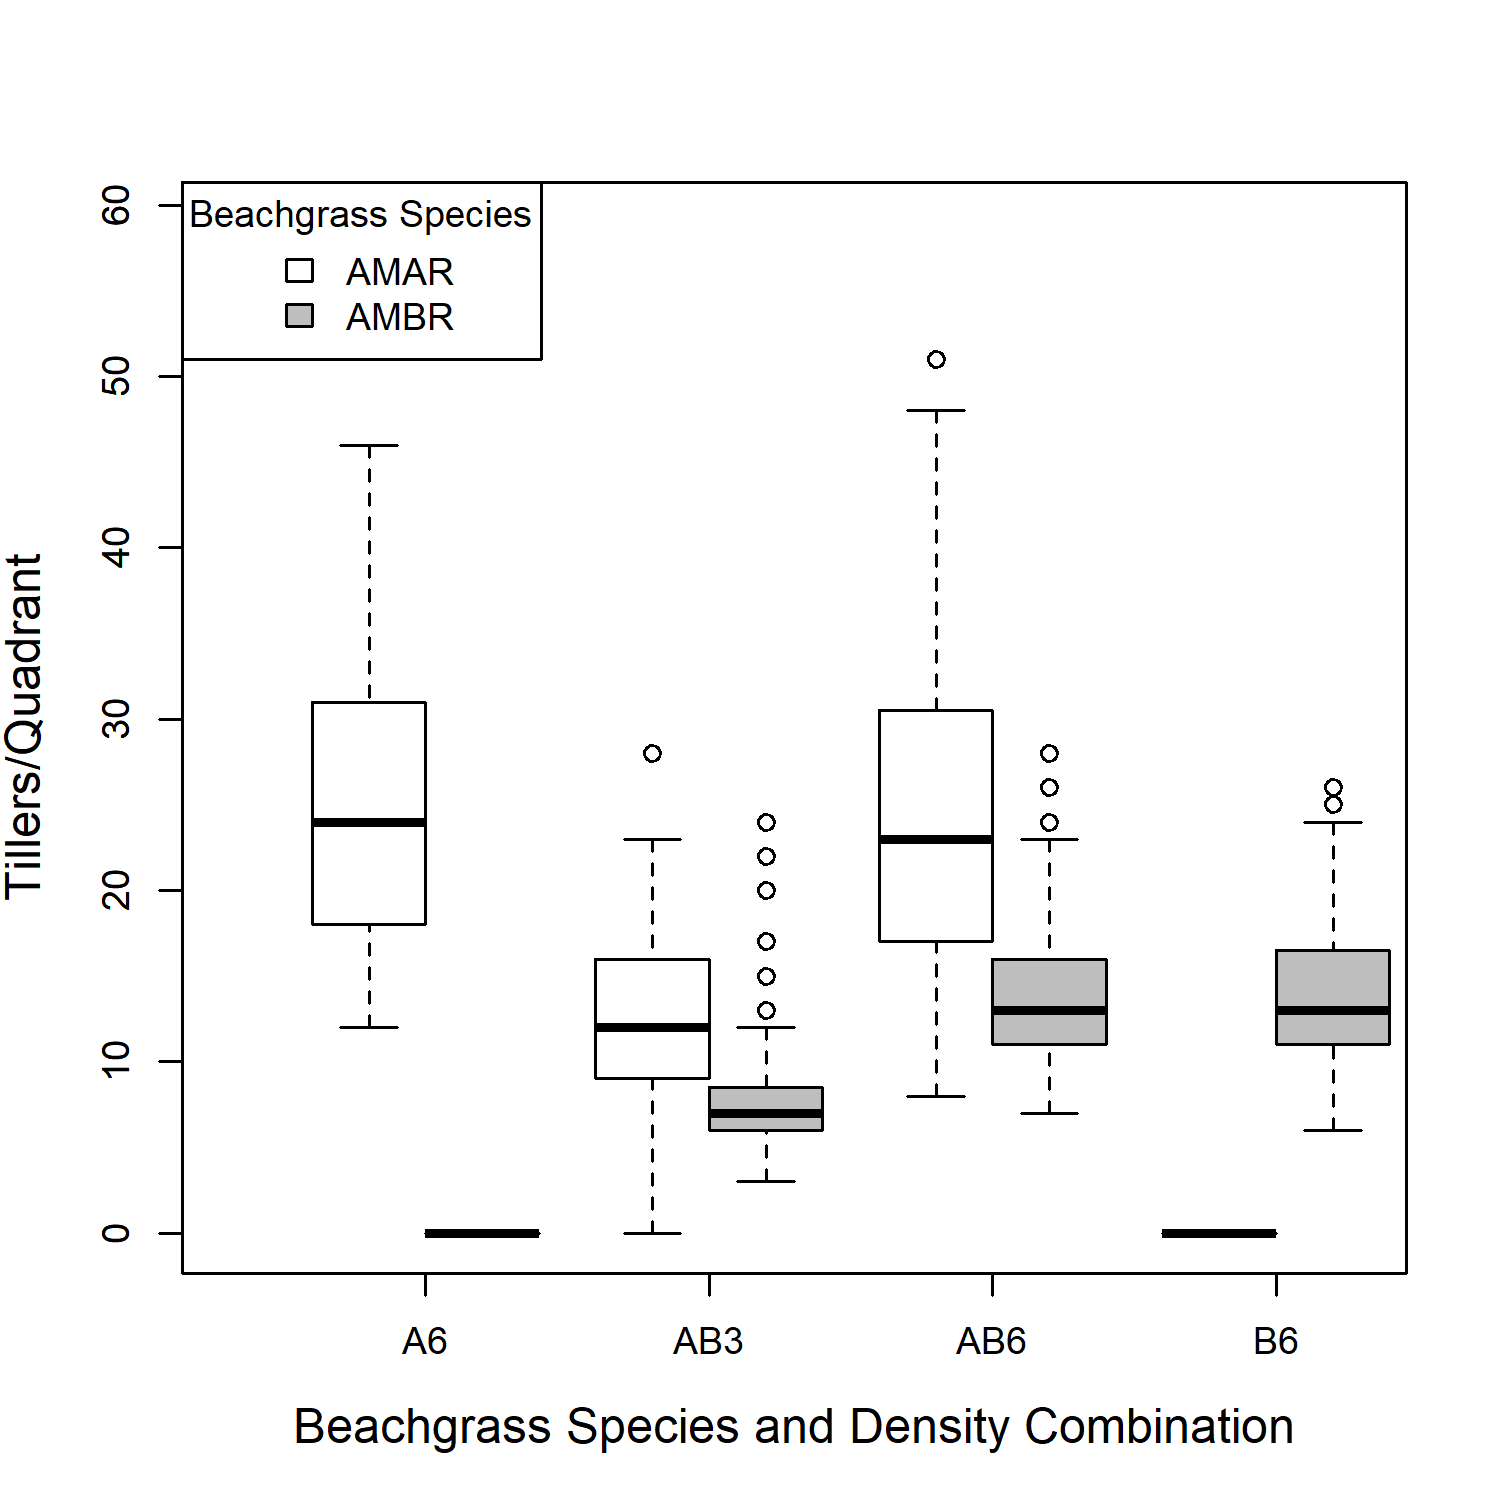


**Figure S3.** Initial *A. arenaria* (AMAR; white) and *A. breviligulata* (AMBR; gray) tiller densities per quadrant for each beachgrass plant density treatment combination. A6 = 6 *Ammophila arenaria* plants; AB3 = 3 *A. arenaria* and 3 *A. breviligulata* plants; and AB6 indicates 6 *A. arenaria* and 6 *A. breviligulata* plants; B6 = 6 *A. breviligulata* plants.
